# Supplementary material for: Role of Intracellular and Extracellular Annexin A1 in MIA PaCa-2 Spheroids Formation and Drug Sensitivity
Source: MDPI journal article supplement (doi:10.3390/cancers14194764), 2022-09-29
Supplement: s1 [file s1]

| Category | Term                                                     | Count | %       | P-Value  | Genes                                                                                                          | Fold Enrichment |
|----------|----------------------------------------------------------|-------|---------|----------|----------------------------------------------------------------------------------------------------------------|-----------------|
| UP       | GO:0008544~epidermis development                         | 14    | 10.9375 | 9.16E-07 | P31944, P01040, P49862, Q86YZ3, Q15517, P23490, Q5T750, P15924, Q08188, Q01469, Q9NZT1, P20930, P22735, Q5D862 | 5.309356725     |
| UP       | GO:0043588~skin development                              | 12    | 9.375   | 9.76E-06 | P02452, P20930, P22735, P31944, P01040, Q86YZ3, Q15517, P23490, Q5D862, P15924, P14923, Q08188                 | 5.188           |
| UP       | GO:0030216~keratinocyte differentiation                  | 9     | 7.03125 | 4.27E-06 | P20930, P22735, P31944, P01040, Q86YZ3, Q15517, P23490, P15924, Q08188                                         | 8.458695652     |
| UP       | GO:0009913~epidermal cell differentiation                | 9     | 7.03125 | 1.03E-04 | P20930, P22735, P31944, P01040, Q86YZ3, Q15517, P23490, P15924, Q08188                                         | 5.722058824     |
| UP       | GO:0044057~regulation of system process                  | 9     | 7.03125 | 0.006534 | Q01469, Q12797, P07900, Q99996, P15924, P14923, P42892, P19971, P12883                                         | 3.137903226     |
| UP       | GO:0031589~cell-substrate adhesion                       | 9     | 7.03125 | 0.007203 | P02452, P18206, P06756, P12814, P14923, Q15262, P32004, O75044, P02751                                         | 3.088095238     |
| UP       | GO:0003012~muscle system process                         | 9     | 7.03125 | 0.007923 | P35749, Q12797, Q6ZMU5, P07900, Q99996, P15924, P14923, Q8WZ42, P12883                                         | 3.03984375      |
| UP       | GO:0006936~muscle contraction                            | 8     | 6.25    | 0.006924 | P35749, Q12797, P07900, Q99996, P15924, P14923, Q8WZ42, P12883                                                 | 3.458666667     |
| UP       | GO:0010951~negative regulation of endopeptidase activity | 8     | 6.25    | 0.008597 | P19823, Q8IW75, P01040, P48594, P01009, Q96P63, P02788, P01023                                                 | 3.325641026     |
| UP       | GO:0010466~negative regulation of peptidase activity     | 8     | 6.25    | 0.012808 | P19823, Q8IW75, P01040, P48594, P01009, Q96P63, P02788, P01023                                                 | 3.088095238     |
| UP       | GO:0034330~cell junction organization                    | 8     | 6.25    | 0.01406  | P18206, Q13835, Q02413, P12814, P15924, P14923, Q15262, P02751                                                 | 3.033918129     |
| UP       | GO:0018149~peptide cross-linking                         | 7     | 5.46875 | 1.49E-06 | P20930, P22735, P01040, P23490, P15924, P02751, Q08188                                                         | 15.13166667     |
| UP       | GO:0060048~cardiac muscle contraction                    | 7     | 5.46875 | 0.001101 | Q12797, P07900, Q99996, P15924, P14923, Q8WZ42, P12883                                                         | 5.604320988     |
| UP       | GO:0006941~striated muscle contraction                   | 7     | 5.46875 | 0.002355 | Q12797, P07900, Q99996, P15924, P14923, Q8WZ42, P12883                                                         | 4.881182796     |
| UP       | GO:1903522~regulation of blood circulation               | 7     | 5.46875 | 0.004467 | Q12797, P07900, Q99996, P15924, P14923, P42892, P12883                                                         | 4.323333333     |
| UP       | GO:0060047~heart contraction                             | 7     | 5.46875 | 0.004467 | Q12797, P07900, Q99996, P15924, P14923, Q8WZ42, P12883                                                         | 4.323333333     |
| UP       | GO:0003015~heart process                                 | 7     | 5.46875 | 0.00773  | Q12797, P07900, Q99996, P15924, P14923, Q8WZ42, P12883                                                         | 3.87991453      |
| UP       | GO:0007160~cell-matrix adhesion                          | 7     | 5.46875 | 0.008761 | P18206, P06756, P12814, P14923, Q15262, P32004, P02751                                                         | 3.782916667     |
| UP       | GO:0034329~cell junction assembly                        | 7     | 5.46875 | 0.022829 | P18206, Q13835, Q02413, P12814, P14923, Q15262, P02751                                                         | 3.088095238     |

|    |                                                           |   |         |          |                                                        |             |
|----|-----------------------------------------------------------|---|---------|----------|--------------------------------------------------------|-------------|
| UP | GO:0045216~cell-cell junction organization                | 7 | 5.46875 | 0.024998 | P18206, Q13835, Q02413, P12814, P15924, P14923, Q15262 | 3.026333333 |
| UP | GO:0031424~keratinization                                 | 6 | 4.6875  | 1.08E-06 | P22735, P31944, Q86YZ3, Q15517, P23490, Q08188         | 21.61666667 |
| UP | GO:0006942~regulation of striated muscle contraction      | 6 | 4.6875  | 0.001294 | Q12797, P07900, Q99996, P15924, P14923, P12883         | 6.826315789 |
| UP | GO:0006937~regulation of muscle contraction               | 6 | 4.6875  | 0.005657 | Q12797, P07900, Q99996, P15924, P14923, P12883         | 4.988461538 |
| UP | GO:0008016~regulation of heart contraction                | 6 | 4.6875  | 0.00915  | Q12797, P07900, Q99996, P15924, P14923, P12883         | 4.472413793 |
| UP | GO:0002831~regulation of response to biotic stimulus      | 6 | 4.6875  | 0.015801 | P07900, P49862, P27361, P02788, Q9NZM5, P05089         | 3.93030303  |
| UP | GO:0090257~regulation of muscle system process            | 6 | 4.6875  | 0.017862 | Q12797, P07900, Q99996, P15924, P14923, P12883         | 3.814705882 |
| UP | GO:0002449~lymphocyte mediated immunity                   | 6 | 4.6875  | 0.037324 | P48594, P05089, P25311, P01893, P04003, P01782         | 3.163414634 |
| UP | GO:0055117~regulation of cardiac muscle contraction       | 5 | 3.90625 | 0.006297 | Q12797, P07900, Q99996, P15924, P14923                 | 6.357843137 |
| UP | GO:1990138~neuron projection extension                    | 5 | 3.90625 | 0.016212 | P18206, P07900, Q96F07, P32004, P02751                 | 4.912878788 |
| UP | GO:0060560~developmental growth involved in morphogenesis | 5 | 3.90625 | 0.025225 | P18206, P07900, Q96F07, P32004, P02751                 | 4.323333333 |
| UP | GO:0002706~regulation of lymphocyte mediated immunity     | 5 | 3.90625 | 0.028783 | P48594, P05089, P25311, P01893, P04003                 | 4.157051282 |
| UP | GO:0048588~developmental cell growth                      | 5 | 3.90625 | 0.041169 | P18206, P07900, Q96F07, P32004, P02751                 | 3.727011494 |
| UP | GO:0050891~multicellular organismal water homeostasis     | 4 | 3.125   | 0.002878 | P20930, P15121, Q86YZ3, Q5D862                         | 12.35238095 |
| UP | GO:0030104~water homeostasis                              | 4 | 3.125   | 0.004452 | P20930, P15121, Q86YZ3, Q5D862                         | 10.80833333 |
| UP | GO:0014065~phosphatidylinositol 3-kinase signaling        | 4 | 3.125   | 0.011855 | Q8IW75, Q8IY47, Q9NZM5, P02751                         | 7.860606061 |
| UP | GO:0048015~phosphatidylinositol-mediated signaling        | 4 | 3.125   | 0.023652 | Q8IW75, Q8IY47, Q9NZM5, P02751                         | 6.176190476 |
| UP | GO:0001910~regulation of leukocyte mediated cytotoxicity  | 4 | 3.125   | 0.023652 | P48594, P05089, P25311, P01893                         | 6.176190476 |
| UP | GO:0048017~inositol lipid-mediated signaling              | 4 | 3.125   | 0.023652 | Q8IW75, Q8IY47, Q9NZM5, P02751                         | 6.176190476 |

|      |                                                                            |   |          |          |                                        |             |
|------|----------------------------------------------------------------------------|---|----------|----------|----------------------------------------|-------------|
| UP   | GO:0072376~protein activation cascade                                      | 4 | 3.125    | 0.028595 | P02751, P01023, P04003, P01782         | 5.764444444 |
| UP   | GO:0002027~regulation of heart rate                                        | 4 | 3.125    | 0.028595 | Q99996, P15924, P14923, P12883         | 5.764444444 |
| UP   | GO:0031341~regulation of cell killing                                      | 4 | 3.125    | 0.034043 | P48594, P05089, P25311, P01893         | 5.404166667 |
| UP   | GO:0060135~maternal process involved in female pregnancy                   | 4 | 3.125    | 0.034043 | P15121, Q02413, P27361, P05089         | 5.404166667 |
| UP   | GO:0048675~axon extension                                                  | 4 | 3.125    | 0.046423 | P18206, P07900, P32004, P02751         | 4.803703704 |
| UP   | GO:0045229~external encapsulating structure organization                   | 3 | 2.34375  | 0.006074 | P22735, Q86YZ3, Q08188                 | 21.61666667 |
| UP   | GO:0043163~cell envelope organization                                      | 3 | 2.34375  | 0.006074 | P22735, Q86YZ3, Q08188                 | 21.61666667 |
| UP   | GO:0090136~epithelial cell-cell adhesion                                   | 3 | 2.34375  | 0.011785 | P18206, P15924, P14923                 | 16.2125     |
| UP   | GO:0061436~establishment of skin barrier                                   | 3 | 2.34375  | 0.011785 | P20930, Q86YZ3, Q5D862                 | 16.2125     |
| UP   | GO:0033561~regulation of water loss via skin                               | 3 | 2.34375  | 0.019054 | P20930, Q86YZ3, Q5D862                 | 12.97       |
| UP   | GO:0045109~intermediate filament organization                              | 3 | 2.34375  | 0.027731 | Q13835, P15924, P07197                 | 10.80833333 |
| UP   | GO:0002920~regulation of humoral immune response                           | 3 | 2.34375  | 0.037672 | P49862, P01023, P04003                 | 9.264285714 |
| UP   | GO:0002707~negative regulation of lymphocyte mediated immunity             | 3 | 2.34375  | 0.048745 | P48594, P05089, P04003                 | 8.10625     |
| UP   | GO:0055008~cardiac muscle tissue morphogenesis                             | 3 | 2.34375  | 0.048745 | P15924, Q8WZ42, P12883                 | 8.10625     |
| UP   | GO:0086091~regulation of heart rate by cardiac conduction                  | 3 | 2.34375  | 0.048745 | Q99996, P15924, P14923                 | 8.10625     |
| UP   | GO:0060324~face development                                                | 3 | 2.34375  | 0.048745 | P02452, Q12797, P27361                 | 8.10625     |
| DOWN | GO:0071902~positive regulation of protein serine/threonine kinase activity | 5 | 5.617978 | 0.040026 | Q13443, P14635, Q9NWS0, P09038, Q9NQS7 | 3.770348837 |
| DOWN | GO:1901976~regulation of cell cycle checkpoint                             | 4 | 4.494382 | 0.022516 | Q13769, Q9NXR7, P14635, Q9NQS7         | 6.3500612   |

|      |                                                                            |   |          |          |                                |             |
|------|----------------------------------------------------------------------------|---|----------|----------|--------------------------------|-------------|
| DOWN | GO:0007080~mitotic metaphase plate congression                             | 4 | 4.494382 | 0.041837 | Q99661, P14635, Q9BW19, Q9NQS7 | 5.027131783 |
| DOWN | GO:0051310~metaphase plate congression                                     | 4 | 4.494382 | 0.041837 | Q99661, P14635, Q9BW19, Q9NQS7 | 5.027131783 |
| DOWN | GO:0051988~regulation of attachment of spindle microtubules to kinetochore | 3 | 3.370787 | 0.026134 | Q9H0H5, P14635, Q9NQS7         | 11.31104651 |

**Table S2. GO enrichment analysis of ANXA1 KO and WT up- and down-regulated proteins.**

This table reports the GO enrichment analysis for the *Biological Process* terms for both ANXA1 KO up- and down-regulated proteins.

The following data are reported: the category for which an enriched term was obtained (i.e., from up- or down-regulated proteins), the enriched term, the count (i.e., the number of proteins, defined by DAVID as genes, responsible for the enrichment), an enrichment percentage, the P-value correlated to the enriched terms, the genes (i.e., the UniProt accession numbers) and the fold of the enrichment. The showed terms were retrieved filtering out those whose P-Value was > 0.05 and whose Fold enrichment was < 3.
