# Supplementary material for: Role of Intracellular and Extracellular Annexin A1 in MIA PaCa-2 Spheroids Formation and Drug Sensitivity
Source: MDPI journal article supplement (doi:10.3390/cancers14194764), 2022-09-29
Supplement: s1 [file s1]

| Category | Term                   | Count | %        | P-Value  | Genes                                                                                  | Fold Enrichment |
|----------|------------------------|-------|----------|----------|----------------------------------------------------------------------------------------|-----------------|
| UP       | KW-0130~Cell adhesion  | 11    | 8.59375  | 3.37E-05 | P18206, P29322, P06756, P01040, Q13835, Q02413, P14923, Q96F07, P32004, Q08554, P02751 | 4.978602        |
| UP       | KW-0417~Keratinization | 4     | 3.125    | 2.74E-04 | P22735, Q86YZ3, P23490, Q08188                                                         | 23.53521        |
| DOWN     | KW-0498~Mitosis        | 7     | 7.865169 | 0.022644 | Q86WB0, Q99661, Q9NXR7, P14635, Q9NVM9, Q9BW19, Q9NQS7                                 | 3.046296        |

**Table S3. Functional annotation enrichment analysis of ANXA1 KO and WT up- and down-regulated proteins.**

This table reports the Functional annotation enrichment analysis for the *Biological Process keywords* terms for both ANXA1 KO and WT up- and down-regulated proteins. The following data are reported: the category for which an enriched term was obtained (i.e., from up- or down-regulated proteins), the enriched term, the count (i.e., the number of proteins, defined by DAVID as genes, responsible for the enrichment), an enrichment percentage, the P-value correlated to the enriched terms, the genes (i.e., the UniProt accession numbers) and the fold of the enrichment. The showed terms were retrieved filtering out those whose P-Value was > 0.05 and whose Fold enrichment was < 3.
