# Supplementary material for: Role of Intracellular and Extracellular Annexin A1 in MIA PaCa-2 Spheroids Formation and Drug Sensitivity
Source: Cancers (Basel). 2022 Sep 29;14(19):4764. doi: 10.3390/cancers14194764 (PMC9563593; doi:10.3390/cancers14194764)
Supplement: Supplementary file 1 [file cancers-14-04764-s001.zip]

Archive with 6 entries (6 files):
- figure S1.tif
- figure S2.tif
- File S1.pdf
- Table S1.pdf
- Table S2.pdf
- Table S3.pdf
