# Supplementary figures and images for: Role of Intracellular and Extracellular Annexin A1 in MIA PaCa-2 Spheroids Formation and Drug Sensitivity
Source: MDPI journal article supplement (doi:10.3390/cancers14194764), 2022-09-29

Cyclin A2

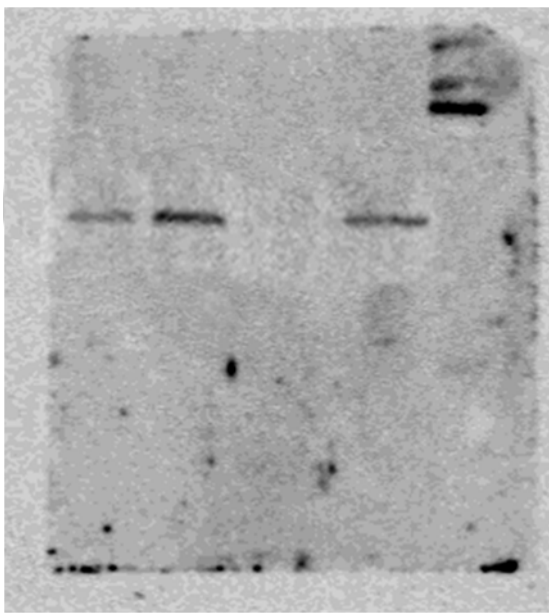

Cyclin E1

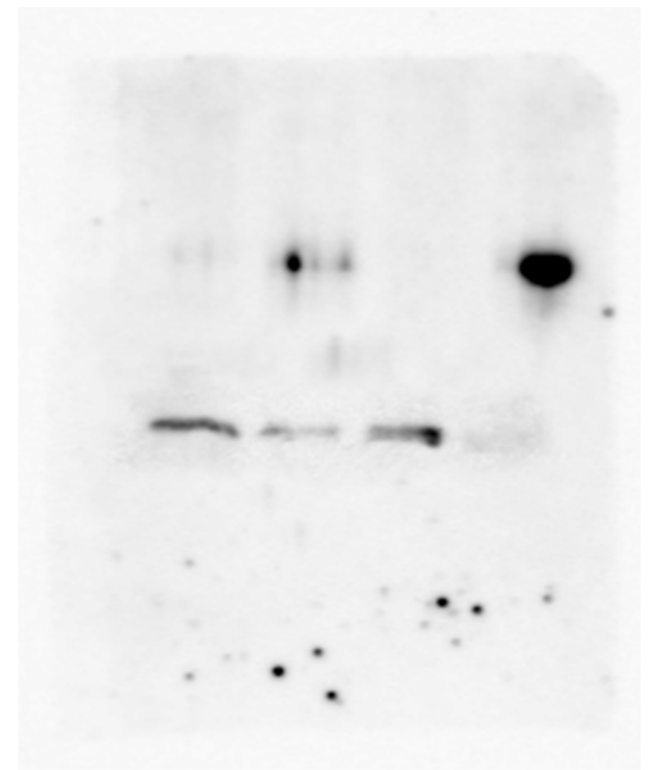

Cyclin B1

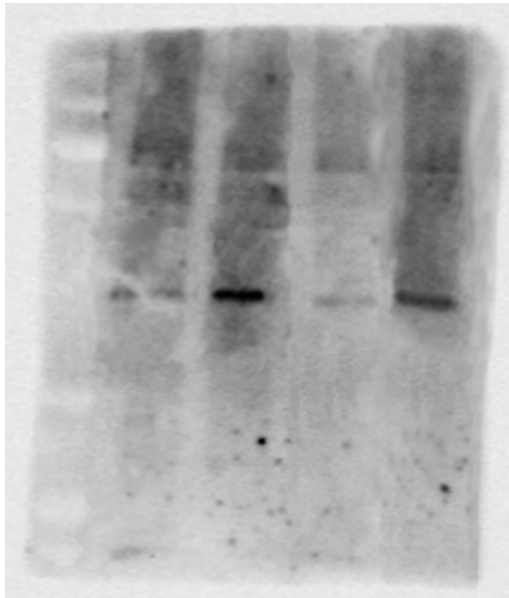

GAPDH

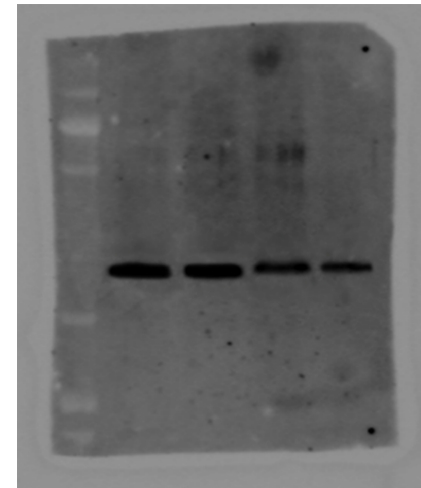

Supplement: s1 [file s1]
